# Supplementary material
Source: MDPI journal article supplement (https://www.mdpi.com/2073-4395/12/3/737)
Supplement: s1 [file s1]

**Table S1.** SD values for plant yielding.

| <b>Foliar spray</b> | <b>Pot cultivation</b> |             | <b>Hydroponic</b> |             |
|---------------------|------------------------|-------------|-------------------|-------------|
|                     | <b>N-70</b>            | <b>N-90</b> | <b>N-70</b>       | <b>N-90</b> |
| <b>Se</b>           | 18.1                   | 13.6        | 22.7              | 25.4        |
| <b>Si</b>           | 18.4                   | 21.1        | 8.1               | 11.5        |
| <b>Li</b>           | 17.0                   | 14.4        | 37.4              | 39.4        |
| <b>V</b>            | 19.5                   | 26.7        | 28.9              | 19.3        |
| <b>SA</b>           | 8.8                    | 18.5        | 8.9               | 16.9        |
| <b>Control</b>      | 27.2                   | 26.3        | 18.8              | 30.4        |

**Table S2.** SD values for content of N, P, K, Ca, Mg, Na in leaves.

| <b>Foliar spray</b>    | <b>N</b>    |             | <b>P</b>    |             | <b>K</b>    |             | <b>Ca</b>   |             | <b>Mg</b>   |             | <b>Na</b>   |             |
|------------------------|-------------|-------------|-------------|-------------|-------------|-------------|-------------|-------------|-------------|-------------|-------------|-------------|
|                        | <b>N-70</b> | <b>N-90</b> |
| <b>Pot cultivation</b> |             |             |             |             |             |             |             |             |             |             |             |             |
| <b>Se</b>              | 0.14        | 0.08        | 0.04        | 0.06        | 0.29        | 0.59        | 0.06        | 0.10        | 0.04        | 0.01        | 0.01        | 0.02        |
| <b>Si</b>              | 0.27        | 0.08        | 0.02        | 0.03        | 0.96        | 0.19        | 0.57        | 0.39        | 0.05        | 0.03        | 0.03        | 0.02        |
| <b>Li</b>              | 0.32        | 0.07        | 0.01        | 0.13        | 0.50        | 0.19        | 0.36        | 0.53        | 0.02        | 0.03        | 0.01        | 0.00        |
| <b>V</b>               | 0.28        | 0.11        | 0.05        | 0.02        | 0.34        | 0.25        | 0.72        | 1.36        | 0.01        | 0.04        | 0.01        | 0.02        |
| <b>SA</b>              | 0.04        | 0.08        | 0.06        | 0.07        | 0.33        | 0.02        | 0.19        | 0.93        | 0.02        | 0.04        | 0.00        | 0.02        |
| <b>Control</b>         | 0.23        | 0.14        | 0.03        | 0.02        | 0.38        | 0.36        | 1.20        | 1.03        | 0.01        | 0.02        | 0.02        | 0.02        |
| <b>Hydroponic</b>      |             |             |             |             |             |             |             |             |             |             |             |             |
| <b>Se</b>              | 0.14        | 0.08        | 0.04        | 0.09        | 0.16        | 0.20        | 0.35        | 0.05        | 0.12        | 0.05        | 0.02        | 0.02        |
| <b>Si</b>              | 0.27        | 0.08        | 0.01        | 0.08        | 0.22        | 0.44        | 0.36        | 0.03        | 0.12        | 0.04        | 0.03        | 0.01        |
| <b>Li</b>              | 0.32        | 0.07        | 0.12        | 0.08        | 0.41        | 0.71        | 0.13        | 0.14        | 0.04        | 0.06        | 0.03        | 0.02        |
| <b>V</b>               | 0.28        | 0.11        | 0.02        | 0.03        | 0.45        | 0.32        | 0.21        | 0.18        | 0.12        | 0.07        | 0.01        | 0.01        |
| <b>SA</b>              | 0.04        | 0.08        | 0.08        | 0.05        | 0.42        | 0.57        | 0.38        | 0.35        | 0.12        | 0.09        | 0.01        | 0.03        |
| <b>Control</b>         | 0.23        | 0.14        | 0.03        | 0.05        | 0.52        | 0.34        | 0.48        | 0.22        | 0.09        | 0.03        | 0.02        | 0.01        |

**Table S3.** SD values for content of Fe, Mn, Zn, Cu in leaves.

| Table 33: SD values for content of Fe, Mn, Zn, Cu in leaves. |      |      |      |      |      |      |      |      |
|--------------------------------------------------------------|------|------|------|------|------|------|------|------|
| Foliar spray                                                 | Fe   | Mn   |      | Zn   |      | Cu   |      |      |
|                                                              | N-70 | N-90 | N-70 | N-90 | N-70 | N-90 | N-70 |      |
| Pot cultivation                                              |      |      |      |      |      |      |      |      |
| Se                                                           | 17.6 | 10.3 | 1.4  | 6.2  | 9.5  | 7.1  | 1.72 | 0.77 |
| Si                                                           | 17.4 | 13.8 | 3.0  | 11.4 | 2.8  | 10.3 | 0.65 | 1.11 |
| Li                                                           | 18.0 | 16.3 | 0.9  | 8.3  | 6.1  | 6.5  | 0.97 | 0.93 |
| V                                                            | 29.4 | 14.8 | 2.3  | 2.8  | 3.3  | 1.9  | 0.60 | 0.78 |
| SA                                                           | 7.9  | 19.7 | 4.4  | 4.2  | 6.8  | 6.1  | 1.14 | 0.96 |
| Control                                                      | 13.8 | 1.6  | 7.7  | 6.0  | 5.4  | 3.9  | 1.09 | 0.64 |
| Hydroponic                                                   |      |      |      |      |      |      |      |      |
| Se                                                           | 11.8 | 13.2 | 9.0  | 7.4  | 2.4  | 1.5  | 0.49 | 0.39 |
| Si                                                           | 25.7 | 25.9 | 4.5  | 5.0  | 3.9  | 6.2  | 0.85 | 1.20 |
| Li                                                           | 5.3  | 11.3 | 3.4  | 12.9 | 2.8  | 5.8  | 0.19 | 0.16 |
| V                                                            | 9.3  | 17.4 | 1.9  | 0.4  | 5.2  | 8.6  | 0.38 | 0.30 |
| SA                                                           | 3.0  | 14.5 | 6.0  | 4.6  | 0.2  | 2.3  | 0.54 | 0.92 |
| Control                                                      | 9.9  | 5.3  | 5.9  | 5.1  | 8.6  | 4.5  | 0.30 | 0.74 |

**Table S4.** SD values for color parameters.

| Foliar spray           | L* (D65) |       | a* (D65) green |       | b* (D65) yellow |       | h* [°](D65) |       | C*    |       |
|------------------------|----------|-------|----------------|-------|-----------------|-------|-------------|-------|-------|-------|
|                        | N-70     | N-90  | N-70           | N-90  | N-70            | N-90  | N-70        | N-90  | N-70  | N-90  |
| <b>Pot cultivation</b> |          |       |                |       |                 |       |             |       |       |       |
| Se                     | 0.006    | 0.006 | 0.006          | 0.006 | 0.006           | 0.021 | 0.012       | 0.015 | 0.007 | 0.021 |
| Si                     | 0.006    | 0.006 | 0.010          | 0.006 | 0.020           | 0.021 | 0.006       | 0.029 | 0.022 | 0.017 |
| Li                     | 0.000    | 0.006 | 0.010          | 0.010 | 0.006           | 0.006 | 0.020       | 0.026 | 0.009 | 0.006 |
| V                      | 0.000    | 0.000 | 0.012          | 0.010 | 0.012           | 0.010 | 0.020       | 0.025 | 0.013 | 0.008 |
| SA                     | 0.000    | 0.000 | 0.010          | 0.017 | 0.021           | 0.017 | 0.010       | 0.040 | 0.023 | 0.014 |
| Control                | 0.000    | 0.006 | 0.000          | 0.006 | 0.025           | 0.035 | 0.017       | 0.020 | 0.024 | 0.034 |
| <b>Hydroponic</b>      |          |       |                |       |                 |       |             |       |       |       |
| Se                     | 0.000    | 0.000 | 0.010          | 0.012 | 0.012           | 0.015 | 0.025       | 0.010 | 0.011 | 0.018 |
| Si                     | 0.000    | 0.006 | 0.006          | 0.006 | 0.010           | 0.015 | 0.030       | 0.012 | 0.009 | 0.015 |
| Li                     | 0.006    | 0.000 | 0.006          | 0.000 | 0.006           | 0.015 | 0.006       | 0.020 | 0.007 | 0.014 |
| V                      | 0.000    | 0.000 | 0.010          | 0.006 | 0.010           | 0.021 | 0.020       | 0.012 | 0.013 | 0.021 |
| SA                     | 0.000    | 0.006 | 0.012          | 0.012 | 0.010           | 0.010 | 0.015       | 0.025 | 0.013 | 0.010 |
| Control                | 0.006    | 0.006 | 0.012          | 0.006 | 0.015           | 0.012 | 0.010       | 0.012 | 0.018 | 0.012 |

**Table S5.** SD values for chlorophylls and carotenoids.

| Foliar spray           | Chl a     |       | Chl b     |       | Carotenoid (x+c) |       | Chl a+Chl b |       | Chl a/Chl b |       | (Chl a+Chl b)/(x+c) |       |
|------------------------|-----------|-------|-----------|-------|------------------|-------|-------------|-------|-------------|-------|---------------------|-------|
|                        | (mg/g DW) |       | (mg/g DW) |       | (mg/g DW)        |       | (mg/g DW)   |       |             |       |                     |       |
|                        | N-70      | N-90  | N-70      | N-90  | N-70             | N-90  | N-70        | N-90  | N-70        | N-90  | N-70                | N-90  |
| <b>Pot cultivation</b> |           |       |           |       |                  |       |             |       |             |       |                     |       |
| Se                     | 0.008     | 0.076 | 0.020     | 0.068 | 0.007            | 0.001 | 0.028       | 0.144 | 0.025       | 0.063 | 0.037               | 0.077 |
| Si                     | 0.246     | 0.380 | 0.121     | 0.085 | 0.039            | 0.005 | 0.367       | 0.465 | 0.059       | 0.050 | 0.093               | 0.241 |
| Li                     | 0.036     | 0.133 | 0.057     | 0.069 | 0.010            | 0.018 | 0.092       | 0.202 | 0.079       | 0.048 | 0.027               | 0.083 |
| V                      | 0.200     | 0.138 | 0.176     | 0.101 | 0.152            | 0.019 | 0.375       | 0.239 | 0.322       | 0.083 | 0.802               | 0.235 |
| SA                     | 0.362     | 0.119 | 0.329     | 0.051 | 0.033            | 0.035 | 0.690       | 0.170 | 0.278       | 0.021 | 0.346               | 0.008 |
| Control                | 0.141     | 0.084 | 0.065     | 0.054 | 0.029            | 0.023 | 0.207       | 0.138 | 0.035       | 0.035 | 0.045               | 0.190 |
| <b>Hydroponic</b>      |           |       |           |       |                  |       |             |       |             |       |                     |       |
| Se                     | 0.095     | 0.328 | 0.041     | 0.095 | 0.049            | 0.112 | 0.136       | 0.423 | 0.066       | 0.073 | 0.033               | 0.050 |
| Si                     | 0.067     | 0.164 | 0.046     | 0.056 | 0.046            | 0.008 | 0.113       | 0.220 | 0.086       | 0.068 | 0.035               | 0.079 |
| Li                     | 0.041     | 0.095 | 0.049     | 0.129 | 0.061            | 0.061 | 0.008       | 0.034 | 0.171       | 0.443 | 0.116               | 0.114 |
| V                      | 0.126     | 0.081 | 0.064     | 0.125 | 0.054            | 0.039 | 0.190       | 0.207 | 0.094       | 0.381 | 0.173               | 0.143 |
| SA                     | 0.067     | 0.047 | 0.212     | 0.087 | 0.124            | 0.025 | 0.279       | 0.040 | 0.961       | 0.266 | 0.297               | 0.060 |
| Control                | 0.120     | 0.014 | 0.046     | 0.089 | 0.009            | 0.077 | 0.166       | 0.103 | 0.049       | 0.273 | 0.052               | 0.204 |

**Table S6.** SD values for phenolic content and the antioxidant activity.

| Foliar spray           | TPC                       |       | TFC                      |       | TEAC                    |      | DPPH                       |      | FRAP                       |      |
|------------------------|---------------------------|-------|--------------------------|-------|-------------------------|------|----------------------------|------|----------------------------|------|
|                        | (mg GAE g <sup>-1</sup> ) |       | (mg QE g <sup>-1</sup> ) |       | (μmol g <sup>-1</sup> ) |      | (μmol TE g <sup>-1</sup> ) |      | (mmol TE g <sup>-1</sup> ) |      |
|                        | N-70                      | N-90  | N-70                     | N-90  | N-70                    | N-90 | N-70                       | N-90 | N-70                       | N-90 |
| <b>Pot cultivation</b> |                           |       |                          |       |                         |      |                            |      |                            |      |
| Se                     | 0.223                     | 0.005 | 0.188                    | 0.053 | 3.92                    | 1.76 | 4.22                       | 0.60 | 0.02                       | 0.11 |

|                   |       |       |       |       |       |       |      |      |      |      |
|-------------------|-------|-------|-------|-------|-------|-------|------|------|------|------|
| <b>Si</b>         | 0.075 | 0.419 | 0.088 | 0.015 | 20.68 | 2.43  | 1.81 | 2.74 | 0.27 | 0.21 |
| <b>Li</b>         | 0.341 | 0.018 | 0.026 | 0.049 | 1.62  | 4.60  | 0.99 | 0.27 | 0.04 | 0.01 |
| <b>V</b>          | 0.136 | 0.140 | 0.090 | 0.029 | 2.03  | 4.87  | 1.43 | 1.26 | 0.40 | 0.90 |
| <b>SA</b>         | 0.111 | 0.012 | 0.057 | 0.037 | 10.00 | 3.11  | 2.08 | 1.45 | 0.67 | 0.79 |
| <b>Control</b>    | 0.016 | 0.042 | 0.007 | 0.009 | 3.24  | 2.03  | 1.10 | 0.60 | 0.14 | 0.32 |
| <b>Hydroponic</b> |       |       |       |       |       |       |      |      |      |      |
| <b>Se</b>         | 0.313 | 0.611 | 0.087 | 0.014 | 10.54 | 0.54  | 5.18 | 1.87 | 0.23 | 0.36 |
| <b>Si</b>         | 0.210 | 0.792 | 0.157 | 2.127 | 5.95  | 11.49 | 5.76 | 0.91 | 0.32 | 0.08 |
| <b>Li</b>         | 0.056 | 0.430 | 0.103 | 0.003 | 0.27  | 9.06  | 0.33 | 3.26 | 0.31 | 0.20 |
| <b>V</b>          | 0.090 | 0.020 | 0.092 | 0.003 | 8.11  | 3.24  | 5.29 | 2.85 | 0.96 | 0.12 |
| <b>SA</b>         | 0.379 | 0.121 | 0.022 | 0.016 | 3.65  | 0.81  | 0.69 | 0.60 | 0.18 | 0.08 |
| <b>Control</b>    | 0.155 | 0.457 | 0.025 | 0.027 | 1.35  | 12.97 | 1.26 | 3.98 | 0.45 | 0.37 |

**Table S7.** Standardized canonical discriminant function coefficients calculated from the data of the pot experiment.

| principle component | Standardized canonical discriminant function coefficients |        |        |        |        |
|---------------------|-----------------------------------------------------------|--------|--------|--------|--------|
|                     | Root 1                                                    | Root 2 | Root 3 | Root 4 | Root 5 |
| PC 1                | -1.494                                                    | -1.279 | -0.175 | -0.081 | -0.015 |
| PC 2                | -1.472                                                    | 0.684  | 0.016  | 0.274  | 0.169  |
| PC 3                | 0.615                                                     | -0.463 | -0.394 | -0.148 | 0.694  |
| PC 4                | 1.857                                                     | 0.122  | -0.152 | 0.613  | 0.204  |
| PC 5                | -0.451                                                    | 0.204  | -0.828 | -0.314 | -0.245 |
| PC 6                | 0.211                                                     | -0.029 | -1.105 | 0.211  | 0.117  |
| PC 7                | 0.045                                                     | 1.110  | -0.649 | -0.480 | -0.074 |
| PC 8                | -0.181                                                    | -0.503 | -0.269 | -0.095 | 0.404  |
| PC 9                | -0.545                                                    | -0.814 | -0.233 | 0.307  | 0.116  |
| PC 10               | -0.036                                                    | -0.286 | -0.464 | 0.601  | -0.593 |
| discrimination %    | 61.61                                                     | 24.30  | 8.77   | 3.52   | 1.80   |
| cumulative %        | 61.61                                                     | 85.91  | 94.68  | 98.20  | 100.00 |

**Table S8.** Standardized canonical discriminant function coefficients calculated from the data of the hydroponic experiment.

| principle component | Standardized canonical discriminant function coefficients |        |        |        |        |
|---------------------|-----------------------------------------------------------|--------|--------|--------|--------|
|                     | Root 1                                                    | Root 2 | Root 3 | Root 4 | Root 5 |
| PC 1                | -2.379                                                    | -0.149 | -0.083 | -0.005 | 0.044  |
| PC 2                | -0.178                                                    | 0.249  | 0.148  | -0.661 | -0.019 |
| PC 3                | 0.366                                                     | 0.673  | 0.056  | 0.156  | -0.564 |
| PC 4                | -1.047                                                    | -0.742 | -0.201 | -0.193 | -0.579 |
| PC 5                | -0.688                                                    | 0.941  | -0.547 | -0.244 | 0.190  |
| PC 6                | -0.008                                                    | 0.160  | 0.159  | 0.280  | -0.342 |
| PC 7                | -1.416                                                    | 0.616  | 0.740  | 0.203  | -0.075 |

|                  |        |        |        |        |        |
|------------------|--------|--------|--------|--------|--------|
| PC 8             | 0.192  | -0.436 | 0.794  | -0.297 | 0.338  |
| PC 9             | -0.110 | -0.176 | -0.237 | 0.841  | 0.265  |
| discrimination % | 85.40  | 7.44   | 4.30   | 2.15   | 0.71   |
| cumulative %     | 85.40  | 92.84  | 97.14  | 99.29  | 100.00 |
